# Supplementary material
Source: publisher figshare collection journal article supplement (https://acs.figshare.com/ndownloader/files/9189871)
Supplement: Supplementary file 1 [file 9189871]

# Mobility Gradient of Poly(ethylene terephthalate) Chains near a Substrate Scaled by the Thickness of the Adsorbed Layer

*Jianquan Xu,<sup>†</sup> Zhenshan Liu,<sup>†</sup> Yang Lan,<sup>†</sup> Biao Zuo,<sup>†</sup> Xinping Wang,<sup>\*†</sup> Juping Yang,<sup>†</sup>  
Wei Zhang,<sup>†</sup> Wenbing Hu<sup>\*§</sup>*

<sup>†</sup> Department of Chemistry, Key Laboratory of Advanced Textile Materials and Manufacturing Technology of the Education Ministry, Zhejiang Sci-Tech University, Hangzhou 310018, China

<sup>§</sup> Department of Polymer Science and Engineering, State Key Lab of Coordination Chemistry, School of Chemistry and Chemical Engineering, Nanjing University, Nanjing 210023, China

**\*Corresponding author**

wxinping@yahoo.com or wxinping@zstu.edu.cn and wbhu@nju.edu.cn

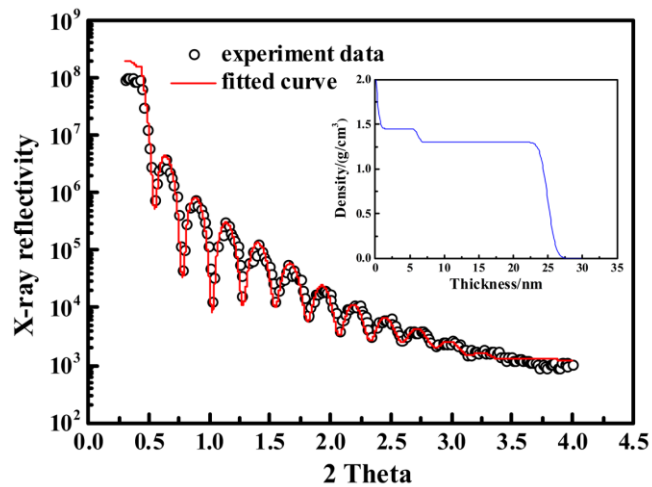

**Figure S1.** XRR data for a 24 nm-thick PET (30 kg/mol) film with  $h_{ads} = 6.2$  nm annealed at 413 K for 30 min. The inset shows the density as a function of the depth. The density was homogeneous from the surface to the bulk and was the same as its amorphous state.

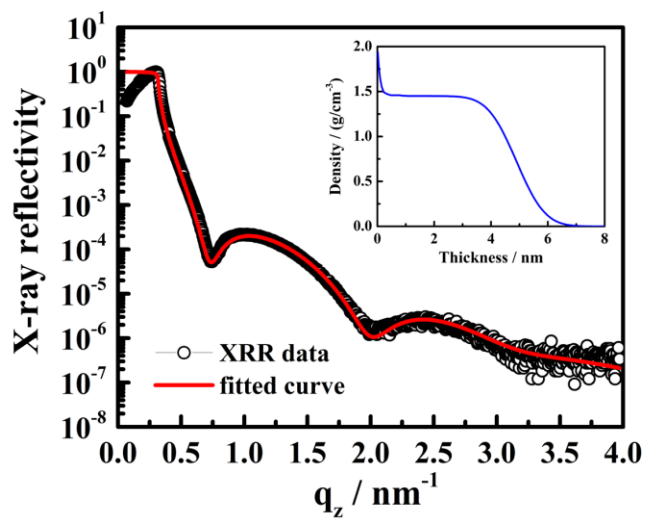

**Figure S2.** XRR data for lone PET adsorbed layer with 5 nm thick. The inset shows the density as a function of the depth.

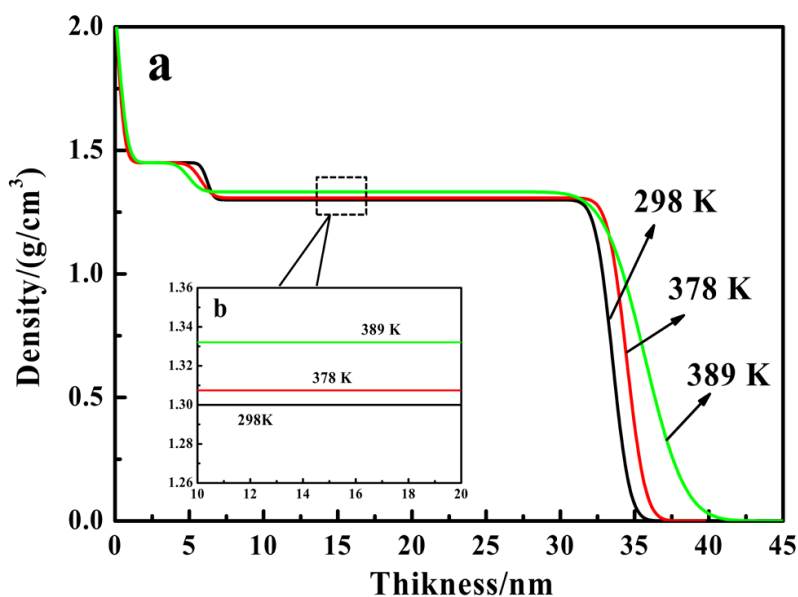

**Figure S3.** (a) Density profile of a  $34 \pm 3$  nm-thick PET film with  $h_{ads} = 5.6$  nm after the film was heated to 378 K and 389 K at a heating rate of 2 K/min and then measured by XRR. (b) Partial enlarged detail of the dashed box. The density is homogeneous from the surface to the bulk and is greater than that of amorphous PET, which indicates that two crystallization processes become a single crystallization process.

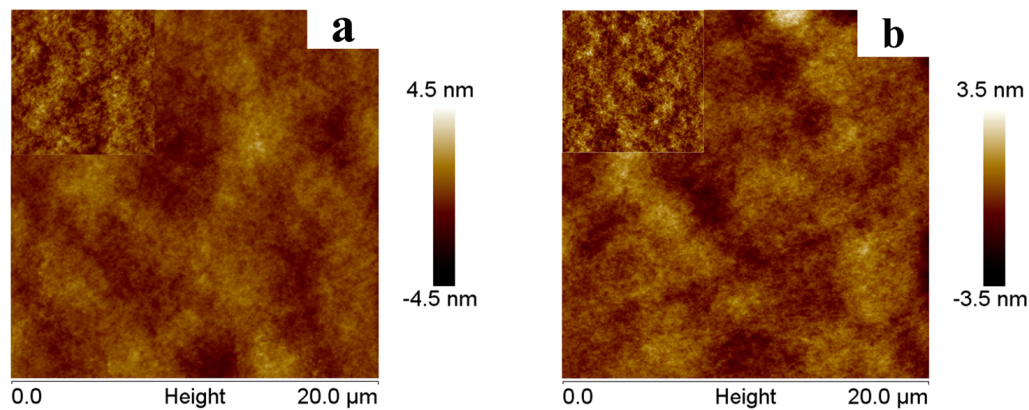

**Figure S4.** Surface topography of a 24 nm-thick PET film with  $h_{ads} = 6.2$  nm. (a) Melt-quenched PET film. (b) Melt-quenched PET film heated at 413 K for 30 min. The inset image is  $5\ \mu\text{m} \times 5\ \mu\text{m}$ . No crystallization structure is observed.

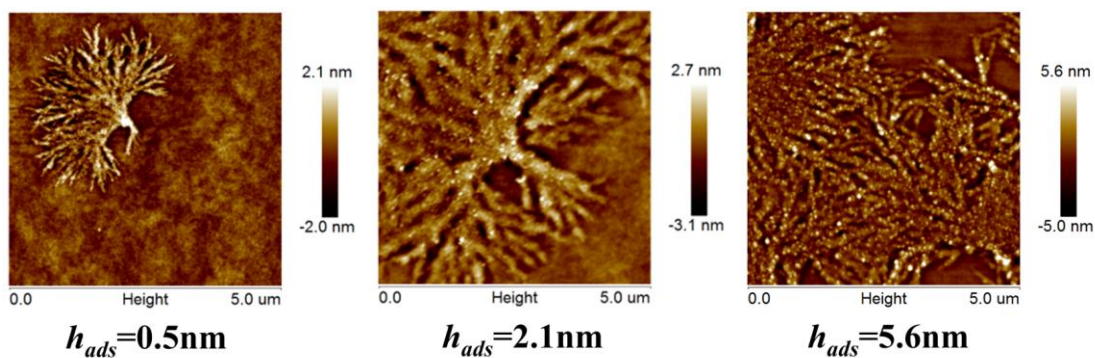

**Figure S5.** Surface crystallization topography of 24 nm-thick PET films with different  $h_{ads}$ .

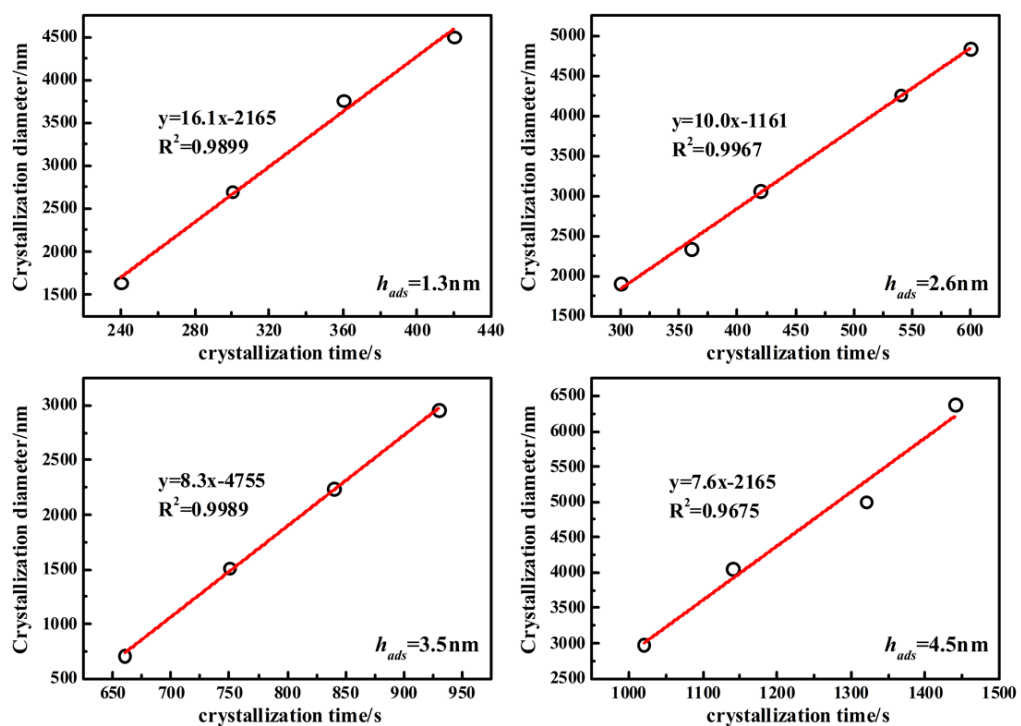

**Figure S6.** Surface crystallization diameters of 24 nm-thick PET films as a function of the crystallization time at 373 K with various thicknesses of adsorbed layers.

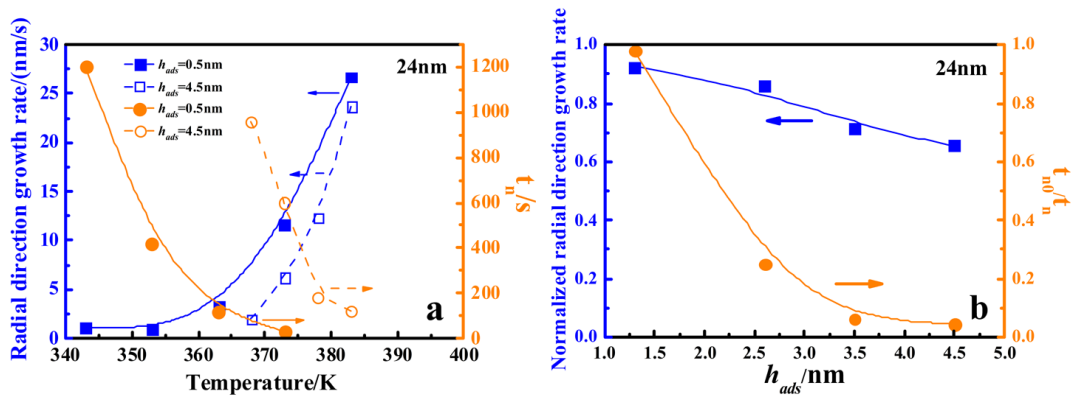

**Figure S7.** Interfacial effect on the surface crystal growth rate and  $t_n$  of supported ultrathin PET film. (a) The crystal growth rate and  $t_n$  versus temperature for 24 nm-thick PET films with 0.5 nm- and 4.5 nm-thick adsorbed layers. (b) Normalized crystal growth rate and reciprocal of the  $t_n$  of a 24 nm-thick PET film with  $h_{ads} = 0.5$  nm versus  $h_{ads}$  on a 24-nm PET film at 373 K. Parameter  $t_n$  was defined as the time at which the crystal could be observed by AFM in this study.

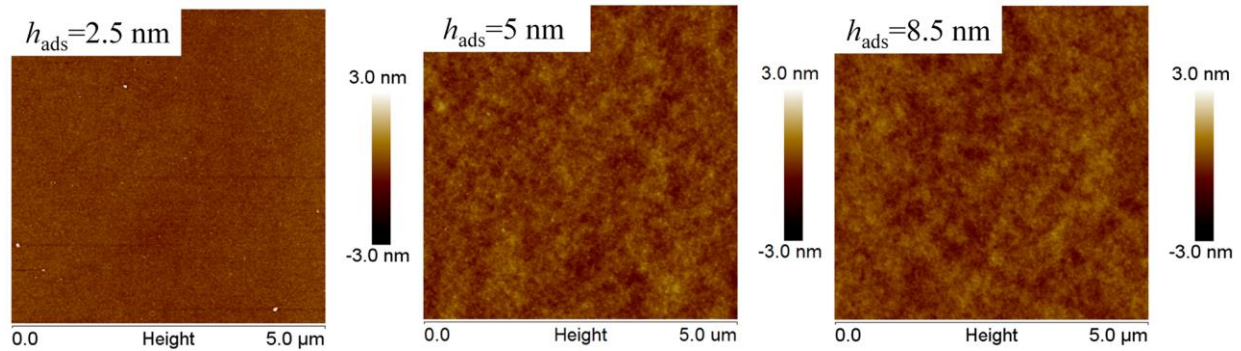

**Figure S8.** Surface topography of lone adsorbed layers with various  $h_{ads}$  heated at 413 K for 30 min. No crystallization structure is observed.
